# Supplementary material
Source: publisher site journal article supplement (https://www.spandidos-publications.com/1836/downloadSupplementary)
Supplement: Supplementary file 1 [file downloadSupplementary]

## Sheet: string_interactions(1)
Table SI. Protein-protein interaction networks of WGCNA brown module genes. WGCNA, weighted gene co-expression network analysis.
Gene1	Gene2	combined score
PSMB2	PSMD2	0.999
RRM2	RRM1	0.999
CDC45	MCM6	0.999
MCM6	MCM4	0.999
TPX2	AURKA	0.999
PTTG1	CDC20	0.999
CDC45	MCM3	0.999
MCM2	MCM3	0.999
CDK1	CCNA2	0.999
PCNA	RFC4	0.999
NCAPD2	NCAPG	0.999
CDK6	CCND1	0.999
FOS	JUNB	0.999
PRIM1	POLA2	0.999
CDC20	CCNB2	0.999
MCM4	MCM5	0.999
CDC45	MCM7	0.999
MCM7	MCM6	0.999
CDK1	CKS2	0.999
MCM7	MCM2	0.999
MCM7	MCM3	0.999
AURKB	CENPA	0.999
CDK1	CDC20	0.999
CDC45	MCM2	0.999
CDK1	CCNB2	0.999
CDT1	MCM6	0.999
JUN	FOS	0.999
CDC20	MAD2L1	0.999
PCNA	FEN1	0.999
UBE2C	CDC20	0.999
MCM2	MCM4	0.999
MCM7	MCM4	0.999
SNRPB	SNRPF	0.999
CDC45	MCM4	0.999
RFC5	PCNA	0.999
RFC5	RFC4	0.999
MCM7	MCM5	0.999
AURKB	MAD2L1	0.999
CDC20	CCNA2	0.999
AURKB	CDC20	0.999
MCM2	GINS2	0.999
MCM2	MCM6	0.999
MCM4	GINS2	0.999
MCM3	MCM5	0.999
CDK1	CKS1B	0.999
ENO1	TPI1	0.999
CDK4	CCND1	0.999
LSM4	SNRPB	0.999
CDK1	CDC25C	0.999
CDC45	GINS2	0.999
MCM2	MCM5	0.999
MCM6	MCM3	0.999
RACGAP1	KIF23	0.999
CDC45	MCM5	0.999
MCM6	MCM5	0.999
MCM4	MCM3	0.999
PSMB2	PSMD4	0.999
PSMD4	PSMD2	0.999
PRIM1	MCM5	0.998
CHEK1	CDC25A	0.998
PRIM1	MCM3	0.998
PRIM1	RFC4	0.998
CDK1	CDC25A	0.998
CDKN2A	CDK4	0.998
CDT1	MCM4	0.998
PCNA	MCM7	0.998
MCM7	GINS2	0.998
CDT1	MCM2	0.998
TFDP1	E2F2	0.998
PCNA	EXO1	0.998
CHEK1	CDC25C	0.998
PCNA	MCM4	0.998
AURKB	CDCA8	0.998
TUBB4B	TUBA1B	0.998
CDK1	MAD2L1	0.998
INTS3	NABP2	0.998
TTK	MAD2L1	0.998
AURKB	KIF2C	0.998
LDLR	PCSK9	0.998
CYC1	UQCRH	0.997
MCM7	POLA2	0.997
MAD2L1	CENPE	0.997
NEK2	CDC20	0.997
POLA2	POLE2	0.997
POLA2	MCM3	0.997
HBB	HBA2	0.997
CENPF	CENPE	0.997
RACGAP1	ECT2	0.997
CDC45	CHEK1	0.997
NEK2	MAD2L1	0.997
RFC4	CHTF18	0.997
CDT1	CCNA2	0.997
CDC20	FBXO5	0.997
CDC20	AURKA	0.997
MCM7	CDT1	0.997
HJURP	CENPA	0.997
POLA2	MCM5	0.997
AURKB	CCNB2	0.997
AURKB	KIF20A	0.997
AURKB	CDK1	0.996
CDKN2A	CDK6	0.996
MAD2L1	CCNB2	0.996
UBE2C	AURKA	0.996
CENPN	CENPA	0.996
AURKB	UBE2C	0.996
PRIM1	MCM4	0.996
DLGAP5	AURKA	0.996
CDC45	POLE2	0.996
AURKB	KIF23	0.996
CENPA	AURKA	0.996
CDK1	RRM2	0.996
CDK1	AURKA	0.996
FEN1	RFC4	0.996
KIF20A	RACGAP1	0.996
TUBB4B	TUBA1C	0.996
PRIM1	MCM7	0.996
CCNB2	CCNA2	0.996
CKS1B	SKP2	0.996
MAD2L1	AURKA	0.996
PTTG1	AURKA	0.996
CDT1	MCM5	0.996
CHEK1	MCM4	0.996
POLA2	MCM4	0.996
MAD2L1	CCNA2	0.996
TUBB	TUBA1B	0.996
CDC20	CENPE	0.996
MCM4	POLE2	0.995
PRIM1	MCM2	0.995
KIF23	ECT2	0.995
GINS2	MCM5	0.995
CDK1	CDCA8	0.995
RPS7	RPL39L	0.995
CDK1	TPX2	0.995
CDK1	NCAPG	0.995
CDK1	PKMYT1	0.995
CDK1	CENPA	0.995
CENPN	CENPM	0.995
CDK1	PCNA	0.995
PRIM1	POLE2	0.995
CDCA8	CDC20	0.995
HMMR	TPX2	0.995
CHEK1	MCM2	0.995
ACTL6A	SMARCA2	0.995
RFC5	PRIM1	0.995
CDK1	CENPE	0.995
TOP2A	PCNA	0.995
CCNA2	PKMYT1	0.995
CDT1	MCM3	0.994
EFTUD2	SNRPF	0.994
PCNA	PRIM1	0.994
MCM6	GINS2	0.994
ATP1B1	ATP1A1	0.994
CCNE1	CDK4	0.994
CCNB2	PKMYT1	0.994
AURKB	RACGAP1	0.994
CENPA	CENPM	0.994
KIF2C	CDCA8	0.993
PCNA	CCND1	0.993
CDC25C	CCNB2	0.993
MYC	JUN	0.993
PRIM1	MCM6	0.993
CDC25C	PKMYT1	0.993
KIF2C	CDC20	0.993
JUN	EGR1	0.993
CKS2	CCNA2	0.993
PSMD4	PSMD10	0.993
CENPA	CENPE	0.993
MCM7	RFC4	0.993
KIF2C	CENPA	0.993
TUBA1B	TUBA1C	0.993
PCNA	CDK4	0.993
TIMELESS	CHEK1	0.993
CDKN2A	MYC	0.993
MCM2	RPA3	0.993
CCNF	CDC20	0.993
PSMD2	PSMD10	0.993
AURKB	CENPE	0.993
UBE2C	MAD2L1	0.992
PCNA	MCM3	0.992
UBE2C	PTTG1	0.992
CDKN2A	CCND1	0.992
PCNA	MCM2	0.992
KIF20A	CDCA8	0.992
HMMR	AURKA	0.992
CDCA8	CENPE	0.992
RFC4	MCM2	0.991
MCM7	CCNA2	0.991
MCM2	ASF1B	0.991
CDK1	FBXO5	0.991
PCNA	CCNE1	0.991
CCNA2	MCM2	0.991
CENPA	MAD2L1	0.991
GINS2	MCM3	0.991
PCNA	RRM2	0.991
SKP2	CCNA2	0.991
CHEK1	EXO1	0.991
CKS2	CCNB2	0.991
CDK1	PRC1	0.991
UBE2C	CCNA2	0.991
POLA2	MCM2	0.991
RFC5	CHTF18	0.99
CDCA8	MAD2L1	0.99
SNRPB	EFTUD2	0.99
CDC45	PRIM1	0.99
AURKB	PTTG1	0.99
MYC	CDK4	0.99
KIF20A	KIF4A	0.99
MPC1	MPC2	0.99
KIF2C	CCNB2	0.99
CCNB2	NCAPG	0.99
CDCA8	CCNB2	0.99
KIF2C	CENPF	0.99
CDC25A	PKMYT1	0.99
RFC4	MCM3	0.99
CENPF	CENPA	0.99
POLE2	MCM5	0.99
CENPA	CDCA8	0.989
CDK1	CENPF	0.989
AURKB	TTK	0.989
CDC25C	CCNA2	0.989
CENPF	CCNB2	0.989
RFC5	MCM7	0.989
CENPA	CCNB2	0.989
TUBB	TUBA1C	0.989
CCNA2	MCM5	0.989
CKS1B	CCNB2	0.989
CDC20	SKP2	0.989
CDK1	KIF2C	0.989
CENPA	CDC20	0.989
EXO1	RFC4	0.989
CDCA8	CDCA5	0.989
CDK1	UBE2C	0.989
KIF4A	KIF23	0.989
CHEK1	MCM7	0.988
CCNA2	MCM6	0.988
CDK1	NEK2	0.988
MYC	CCND1	0.988
TTK	AURKA	0.988
KIF20A	KIF2C	0.988
MCM3	POLE2	0.988
KIF2C	MAD2L1	0.988
MCM2	POLE2	0.988
CKS1B	CCNA2	0.988
CDK1	HMMR	0.988
HSPH1	STIP1	0.988
RFC5	FEN1	0.988
AURKB	NCAPG	0.988
CCNB2	CDK4	0.987
CDCA8	KIF23	0.987
NEK2	TPX2	0.987
PCNA	RRM1	0.987
CENPF	CDCA8	0.987
PCNA	MCM5	0.987
PLK4	AURKA	0.987
CDC25A	CDK4	0.987
JUN	CCND1	0.987
CDC45	POLA2	0.987
AURKB	CENPF	0.987
CENPE	KIF23	0.986
FOS	EGR1	0.986
TYMS	TK1	0.986
KIF4A	RACGAP1	0.986
CENPA	H2AFZ	0.986
KIF4A	CENPE	0.986
RAD21	CDCA5	0.986
CENPF	CDC20	0.986
KIF4A	KIF2C	0.986
PRIM1	FEN1	0.986
CENPF	MAD2L1	0.986
AURKB	AURKA	0.986
E2F2	CCNA2	0.986
CCNB2	CENPE	0.986
RFC5	POLA2	0.986
CDC45	PCNA	0.986
CCNB2	CDK6	0.986
CCNA2	MCM4	0.986
FOS	CCND1	0.985
AURKB	NCAPD2	0.985
H2AFZ	HIST1H4H	0.985
CDC25A	CDK6	0.985
RRM1	MCM2	0.985
CHEK1	RFC4	0.985
KIF20A	CENPE	0.985
KIF2C	CENPE	0.985
CDK1	PLK4	0.985
AURKB	SKA1	0.985
CKAP5	AURKA	0.985
CENPN	CENPL	0.984
RRM2	TYMS	0.984
KIF20A	KIF23	0.984
POLA2	MCM6	0.984
CDCA8	RACGAP1	0.984
PRC1	KIF4A	0.984
C1S	SERPING1	0.984
JUN	PTGS2	0.984
KIF2C	RACGAP1	0.984
AURKB	CENPM	0.983
SKP2	CCNE1	0.983
ALYREF	EFTUD2	0.983
RRM1	MCM4	0.983
CDC20	CENPM	0.983
JUN	ETS2	0.983
MCM7	POLE2	0.983
MCM6	POLE2	0.983
CDK1	CDCA5	0.983
PCNA	POLA2	0.983
CHEK1	MCM3	0.983
CDK1	MCM5	0.983
RFC4	POLA2	0.983
CDC25A	CCNA2	0.982
PTGS2	FOS	0.982
CCNF	SKP2	0.982
HMMR	NEK2	0.982
NEK2	UBE2C	0.982
CDC25A	CCNB2	0.982
TPR	NUP37	0.982
HJURP	CENPN	0.982
PCNA	TYMS	0.982
CDK5	CCNB2	0.982
SERPINA1	A2M	0.982
PCNA	RPA3	0.982
FEN1	POLQ	0.981
CCNB2	CENPM	0.981
RFC5	MCM2	0.981
MYC	SKP2	0.981
CCNA2	MCM3	0.981
CDK1	PBK	0.981
PCNA	PARP1	0.981
TOP2A	NCAPD2	0.981
C1R	SERPING1	0.981
CDC25A	CCNE1	0.981
CDK1	MCM4	0.981
CHEK1	MCM6	0.981
PLK4	TUBG1	0.981
ACTL6A	MYC	0.98
CDK1	CENPN	0.98
HJURP	CENPM	0.98
NEK2	AURKA	0.98
AURKB	CDCA5	0.98
CDC45	CDT1	0.98
RPS7	BOP1	0.98
CKAP5	TUBB	0.98
PCNA	MCM6	0.98
TTK	CDC20	0.979
DKC1	BOP1	0.979
RFC4	POLE2	0.979
CKAP5	TUBB4B	0.979
FEN1	POLA2	0.979
CENPF	KNTC1	0.979
CDCA8	CENPM	0.979
PCNA	CHTF18	0.979
CKAP5	MAD2L1	0.979
CENPN	MAD2L1	0.979
CYC1	TOMM40	0.979
EFTUD2	SF3B4	0.978
AURKB	CENPN	0.978
RACGAP1	CENPE	0.978
TOP2A	NCAPG	0.978
JUN	HMOX1	0.978
CENPA	CDCA5	0.978
CENPN	CCNB2	0.978
RRM1	MCM3	0.978
CENPN	KIF2C	0.978
TUBB4B	TUBB	0.977
CDK6	CCNE1	0.977
CDK1	PTTG1	0.977
KIF2C	KIF23	0.977
MYC	CDC25A	0.977
CDK1	KIF23	0.977
CENPL	CENPM	0.977
FEN1	POLE2	0.977
ALYREF	TPR	0.977
KIF2C	CENPM	0.977
CDK1	RFC4	0.976
PCNA	CDK6	0.976
E2F2	CDK4	0.976
RAD51AP1	POLE2	0.976
CCNB2	AURKA	0.976
KIF2C	AURKA	0.976
HMMR	PLK4	0.976
GTSE1	CCNB2	0.976
RRM2	MCM5	0.976
TTK	NCAPG	0.976
CDK1	JUN	0.976
CHEK1	PCNA	0.975
CENPN	CENPE	0.975
AURKB	RAD21	0.975
CENPN	CDCA8	0.975
PRC1	KIF23	0.975
CKAP5	CENPE	0.975
TNFRSF1B	TRAF2	0.975
CEBPA	JUN	0.975
TOP2A	PRC1	0.975
CDK1	CDKN3	0.975
MCM7	RRM1	0.975
PARP1	RFC4	0.975
CDK1	CENPM	0.975
HIST1H4C	CENPA	0.975
LSM4	EFTUD2	0.975
SKA1	CENPE	0.974
PCNA	POLE2	0.974
SNRPB	SF3B4	0.974
TOP2A	RFC4	0.974
PRIM1	RPA3	0.974
CENPA	HIST1H4H	0.974
LSM4	SNRPF	0.973
TUBG1	AURKA	0.973
EXO1	RAD51AP1	0.973
TPX2	PLK4	0.973
CENPL	CENPA	0.973
CDT1	CCNE1	0.973
CENPN	CDC20	0.972
MAD2L1	CDCA5	0.972
TIMELESS	MCM2	0.972
KIF2C	SKA1	0.972
CDK1	NCAPD2	0.972
PCNA	RAD51C	0.972
E2F2	CDK6	0.972
CENPF	CDCA5	0.972
HIST1H4C	H2AFZ	0.972
CKAP5	TUBG1	0.972
PRC1	RACGAP1	0.971
CDK1	FOS	0.971
NUSAP1	CDK1	0.971
RAD51C	EXO1	0.971
CETN2	TUBG1	0.971
CENPN	CENPF	0.971
CEBPA	FOS	0.971
FEN1	MCM4	0.97
KIF20A	PRC1	0.97
RFC4	RAD51AP1	0.97
KNTC1	MAD2L1	0.97
E2F2	CCNE1	0.97
RFC5	POLE2	0.97
AURKB	DSN1	0.97
RFC5	EXO1	0.97
MAD2L1	NUP37	0.97
FEN1	MCM6	0.97
TUBG1	HAUS4	0.97
CKS2	MAD2L1	0.969
EXO1	POLE2	0.969
RRM1	MCM6	0.969
RRM1	MCM5	0.969
CDK1	KNTC1	0.969
CKAP5	KIF2C	0.969
PCNA	CCNA2	0.969
UBE2T	RFC4	0.969
CENPA	SKA1	0.968
RFC4	RPA3	0.968
CCNB2	CDCA5	0.968
STMN1	CDK1	0.968
CDK1	H2AFZ	0.968
SUV39H1	H2AFZ	0.968
TYMS	MCM5	0.967
TOP2A	CDK1	0.967
CDC20	CDCA5	0.967
CEBPA	CEBPD	0.967
RFC5	CHEK1	0.966
RRM2	MCM4	0.966
C1S	C1R	0.966
PRC1	AURKA	0.966
SKP2	CDK4	0.966
TOP2A	RACGAP1	0.966
RAD51C	RFC4	0.966
CENPF	CENPM	0.966
CCNB2	MCM2	0.965
TOP2A	TYMS	0.965
CEBPA	MYC	0.965
KIF20A	MCM5	0.965
TOP2A	RRM1	0.965
CDC25A	CCND1	0.965
AURKB	PRC1	0.965
MASP1	SERPING1	0.965
KPNA2	TPX2	0.965
E2F2	CCND1	0.965
RRM1	POLA2	0.965
CKAP5	TPX2	0.965
CDK1	TTK	0.965
CDK1	CDT1	0.965
CCNA2	PLK4	0.964
CHEK1	MCM5	0.964
EXO1	RMI2	0.964
MAD2L1	CENPM	0.964
NEK2	PLK4	0.964
KIF2C	CDCA5	0.964
GSPT2	RPS7	0.964
CDK1	E2F2	0.964
CDK1	RAD21	0.964
SKP2	CCND1	0.963
ETS2	FOS	0.963
AURKB	CKAP5	0.963
CCNE1	CCT7	0.963
ID1	ETS2	0.963
RAD21	CCNB2	0.963
AURKB	TPX2	0.963
PCNA	BARD1	0.963
CCNB2	KIF23	0.963
CDC20	RAD21	0.962
TOP2A	CDC20	0.962
CDK1	TFDP1	0.962
RRM2	RFC4	0.962
KIF2C	KNTC1	0.962
MYC	ENO1	0.962
TIMELESS	MCM7	0.961
KIF23	MCM5	0.961
GTSE1	CDK1	0.961
RRM2	NME1	0.961
PUF60	SNRPF	0.96
PTGS2	CYP2E1	0.96
CDCA8	AURKA	0.96
CDCA8	SKA1	0.96
CCNA2	CCNE1	0.96
FEN1	RPA3	0.96
CHEK1	RMI2	0.96
TOP2A	RRM2	0.96
NCAPD2	CCNB2	0.96
RFC4	MCM4	0.96
RRM2	MCM3	0.96
CKAP5	CCNB2	0.96
KNTC1	CENPE	0.96
PCNA	CDT1	0.959
TFDP1	CCNA2	0.959
RFC4	BARD1	0.959
CDC20	SKA1	0.959
SFN	CDC25C	0.959
TYMS	MCM4	0.959
CKS1B	MAD2L1	0.959
CDK1	NUP37	0.958
TFDP1	CCNE1	0.958
TTK	CDCA8	0.958
CHAF1B	ASF1B	0.958
HMGB2	NME1	0.958
CENPN	CDCA5	0.957
TIMELESS	RFC4	0.957
CDK5	FYN	0.957
CENPE	CENPM	0.957
RRM1	NME1	0.957
ADM2	ADM	0.957
SKP2	CDK6	0.957
PCNA	RAD51AP1	0.956
RMI2	RFC4	0.956
CKAP5	CDK1	0.956
CDK1	TUBB4B	0.956
TUBB4B	TUBG1	0.956
CDK1	TUBG1	0.956
MYC	TFDP1	0.956
TOP2A	NSMCE2	0.956
CETN2	PLK4	0.956
KNTC1	CDCA8	0.955
TOP2A	AURKA	0.955
CDK1	TUBB	0.955
DSN1	CENPA	0.954
RAD21	MAD2L1	0.954
FANCG	RFC4	0.954
CDK1	SKA1	0.954
UBE2C	TYMS	0.954
NEB	TMOD1	0.954
TFDP1	CDK6	0.954
E2F2	MCM3	0.954
PCNA	CDC25A	0.954
CENPN	KNTC1	0.954
PRC1	CCNB2	0.954
MYC	SMARCA2	0.953
SNRPF	NUP37	0.953
CHEK1	BARD1	0.953
KIF20A	AURKA	0.953
CDKN3	MAD2L1	0.953
ALYREF	SF3B4	0.953
KNTC1	CCNB2	0.953
ATP5G1	CYC1	0.952
FEN1	MCM5	0.952
CDK1	SFN	0.951
CDCA5	CENPM	0.951
DBH	COMT	0.951
CCNB2	SKA1	0.951
TOP2A	CHEK1	0.951
PRC1	CENPE	0.951
RMI2	RAD51AP1	0.951
FEN1	MCM2	0.951
TYMS	RRM1	0.951
TTK	CENPE	0.951
TOP2A	TTK	0.951
TFDP1	CDK4	0.951
ALYREF	SNRPB	0.95
CETN2	TUBB	0.95
CENPN	SKA1	0.95
CETN2	TUBB4B	0.95
AURKB	KNTC1	0.95
MCM4	RPA3	0.95
PLCG2	CD14	0.95
A2M	SERPING1	0.95
CDK1	KIF20A	0.95
PCNA	CHAF1B	0.949
JUN	SELE	0.949
TUBA1C	CCT7	0.949
RFC5	RAD51AP1	0.949
CBX3	H2AFZ	0.949
RFC5	RAD51C	0.949
SMARCA2	CDK4	0.949
CENPN	STRA13	0.948
RAD21	NSMCE2	0.948
CKAP5	KNTC1	0.948
MYC	E2F2	0.948
CCNA2	CDK4	0.948
TFDP1	MCM3	0.947
CHEK1	RPA3	0.947
FOS	HMOX1	0.947
TIMELESS	EXO1	0.947
TOP2A	NEK2	0.947
DSN1	SKA1	0.947
RRM2	MCM7	0.947
RACGAP1	CCNB2	0.947
RFC5	BARD1	0.947
H2AFZ	CCND1	0.947
KNTC1	CDCA5	0.947
CHEK1	UBE2T	0.947
RAD51C	BARD1	0.946
RPA3	MCM5	0.946
TOP2A	CDC25A	0.946
WDR34	TCTEX1D2	0.946
MCM7	ASF1B	0.946
FANCG	UBE2T	0.946
PLCG2	FYN	0.946
TUBB4B	AURKA	0.946
TUBB	AURKA	0.946
CDCA5	CENPE	0.946
CDK1	CCNE1	0.946
DSN1	KIF2C	0.946
H1F0	HIST1H4H	0.945
TUBB4B	PLK4	0.945
CENPN	DSN1	0.945
TUBB	PLK4	0.945
RFC4	MCM6	0.945
HIST1H4C	H1F0	0.945
CDK1	DLGAP5	0.945
TTK	CCNB2	0.945
PARP1	FEN1	0.945
TOP2A	CCNB2	0.945
MYC	NME1	0.945
CCNF	UBE2C	0.945
FANCG	STRA13	0.945
AURKB	TOP2A	0.945
KNTC1	CDC20	0.944
NSDHL	SQLE	0.944
AURKB	CDC45	0.944
CENPA	KNTC1	0.944
CDKN3	CCNA2	0.944
JUN	JUNB	0.944
TOP2A	MAD2L1	0.944
RFC5	PARP1	0.944
CCNB2	NUP37	0.944
TPX2	DLGAP5	0.943
FEN1	MCM3	0.943
TIMELESS	RFC5	0.943
CDKN3	AURKA	0.943
ALYREF	CPSF4	0.943
CDK1	RACGAP1	0.943
PUF60	SNRPB	0.943
KIF2C	RAD21	0.942
DSN1	KNTC1	0.942
CCNA2	BARD1	0.942
FANCG	BARD1	0.942
KPNA2	CSE1L	0.942
DSN1	CENPE	0.942
CKAP5	PLK4	0.942
EXO1	BARD1	0.941
CDK1	MCM3	0.941
PCNA	GADD45B	0.941
BOLA3	BOLA2	0.941
CENPL	STRA13	0.941
TOP2A	UBE2C	0.941
CDK1	TYMS	0.941
KIF20A	CCNB2	0.941
CCNA2	CDK6	0.941
DCTPP1	NME1	0.941
KNTC1	NUP37	0.941
TUBA1B	CCT7	0.94
CDK5RAP2	TUBG1	0.94
CEBPA	SMARCA2	0.94
CHEK1	FANCG	0.94
CENPA	RAD21	0.94
TIMELESS	RMI2	0.94
TOP2A	TPR	0.939
KNTC1	CENPM	0.939
CCNA2	KIF23	0.939
PRC1	CCNA2	0.939
RAD21	CENPE	0.939
TOP2A	CCNA2	0.939
NUSAP1	DLGAP5	0.939
RAD51C	RPA3	0.939
CDK1	DSN1	0.939
CDC45	AURKA	0.938
MCM7	RPA3	0.938
CENPF	SKA1	0.938
CDK1	H1F0	0.938
CENPN	NUP37	0.938
RMI2	POLE2	0.938
PSMD4	UBE2C	0.937
RRM2	CCNB2	0.937
PTTG1	CCNB2	0.937
CDC45	CDK1	0.937
PSMD4	CCNA2	0.937
PRC1	NCAPG	0.937
TOP2A	ASPM	0.937
PCNA	TFDP1	0.937
UBE2C	SKP2	0.937
CDC45	CCNB2	0.937
PCNA	RMI2	0.936
MCM6	RPA3	0.936
CENPF	NUP37	0.936
CKAP5	CENPA	0.936
HIST1H4H	SMARCA2	0.936
ACTL6A	CETN2	0.936
GSTA4	CYP2E1	0.936
DSN1	CENPF	0.936
DSN1	CDCA8	0.936
TFDP1	CCND1	0.936
HIST1H4C	SMARCA2	0.936
ASPM	NCAPG	0.936
TYMS	MCM2	0.935
MYC	CDCA7	0.935
CENPL	CENPE	0.935
MYC	FOS	0.935
SKA1	CENPM	0.935
PRC1	CDC20	0.935
NUSAP1	KIF2C	0.934
AZI1	AURKA	0.934
CDKN3	CDC20	0.934
MCM7	FEN1	0.934
MAD2L1	PLK4	0.934
LDLR	AGTR1	0.934
ATP2A2	ATP1B1	0.934
DSN1	MAD2L1	0.934
RFC4	MCM5	0.933
TFDP1	RRM2	0.933
PSMD4	CCND1	0.933
AURKB	KIF4A	0.933
RAD51C	RAD51AP1	0.933
POLA2	RPA3	0.933
MAD2L1	NCAPG	0.932
CDK1	HAUS4	0.932
CDK1	PSMD4	0.932
TIMELESS	CDC45	0.932
HJURP	CENPL	0.932
SMARCA2	CCND1	0.932
TOP2A	NUP37	0.932
CENPA	NCAPG	0.932
CDK1	PSMD2	0.932
TUBB4B	CCT7	0.931
EXO1	RPA3	0.931
UBE2C	BARD1	0.931
MCM3	RPA3	0.931
KIF23	AURKA	0.931
FOS	MT2A	0.931
SNRPB	NUP37	0.93
CDK1	SKP2	0.93
SKA1	CDCA5	0.93
CDC45	RPA3	0.93
CDK5RAP2	PLK4	0.93
CENPN	H2AFZ	0.93
STRA13	CENPM	0.93
RAD21	H2AFZ	0.93
RFC5	RPA3	0.93
CENPA	NUP37	0.93
TOP2A	TFDP1	0.93
CENPF	CENPL	0.93
KIF2C	TPX2	0.93
CCNA2	AURKA	0.93
SNRPB	CPSF4	0.93
PRC1	MAD2L1	0.929
EIF3B	RPS7	0.929
PCNA	CDC20	0.929
CENPA	ASF1B	0.929
CDK1	EXO1	0.929
DSN1	CDC20	0.929
CDC25C	CDC25A	0.929
RRM2	CCNA2	0.929
CDC25C	CDC20	0.928
NUSAP1	CCNB2	0.928
CDK1	CCND1	0.928
CENPE	AURKA	0.928
NUSAP1	NCAPG	0.928
PSMD10	AURKA	0.928
AURKB	STMN1	0.928
AURKB	PSMD10	0.928
MYC	TK1	0.927
DSN1	CENPL	0.927
CDK1	CDK4	0.927
AURKB	CCNA2	0.927
CCNE1	PKMYT1	0.927
AOX1	NNMT	0.927
BIN1	PACSIN1	0.927
CENPA	CCNA2	0.927
KIF2C	CENPL	0.927
CCNB2	DLGAP5	0.927
CCNE1	CCND1	0.927
CDCA8	NUP37	0.927
CENPE	NUP37	0.926
JUN	CCNA2	0.926
CDC20	NUP37	0.926
KIF2C	NUP37	0.926
TTK	ASPM	0.926
SERPINA1	SERPING1	0.926
H2AFZ	CDK4	0.926
CENPL	SKA1	0.926
TPR	CPSF4	0.926
PBK	MAD2L1	0.926
SFN	CDK4	0.926
CCNF	CDK1	0.926
CDT1	SKP2	0.926
UBE2T	STRA13	0.926
MAD2L1	SKA1	0.925
CKS1B	CDK4	0.925
TFDP1	SKP2	0.925
PBK	CCNB2	0.925
DSN1	CDCA5	0.925
CDK1	PSMD10	0.925
CHEK1	CCNA2	0.925
UBE2C	H2AFZ	0.925
TOP2A	PBK	0.925
PCNA	MAD2L2	0.925
CDC20	TPX2	0.925
CHEK1	CDK1	0.925
TFDP1	RRM1	0.925
RAD51C	CDK4	0.924
AURKB	NUP37	0.924
UBE2C	CCNB2	0.924
RAD51C	POLE2	0.924
CKAP5	CENPF	0.924
TFDP1	CDC25A	0.924
CKS2	TTK	0.924
CHEK1	CDT1	0.924
PSMB2	PTTG1	0.924
KIF20A	TPX2	0.924
AURKB	CENPL	0.923
TFDP1	CDC25C	0.923
DSN1	CENPM	0.923
UBE2T	RPA3	0.923
CDC20	CDT1	0.923
CDK6	CDK4	0.923
KIF4A	TPX2	0.923
NPLOC4	RFC4	0.923
CCNA2	CENPE	0.922
TPX2	TUBG1	0.922
AZI1	PLK4	0.922
PRC1	CDKN3	0.922
TTK	CCNA2	0.922
JUN	MT2A	0.922
EPHA2	FYN	0.922
CDK1	CETN2	0.922
SFN	CCNB2	0.922
ACTL6A	CDK4	0.922
CETN2	CDK5RAP2	0.922
PCNA	H2AFZ	0.922
AURKB	CDKN3	0.921
CDK1	CDK6	0.921
MAD2L1	DLGAP5	0.921
RPA3	POLE2	0.921
RRM2	MAD2L1	0.921
HJURP	H2AFZ	0.921
TOP2A	MCM2	0.921
RFC5	UBE2T	0.921
TUBB	TUBG1	0.921
PCNA	MAD2L1	0.921
RFC5	FANCG	0.921
CENPA	STRA13	0.921
CDKN3	PLK4	0.921
CETN2	NEK2	0.921
CKS1B	CDC20	0.921
CKAP5	HMMR	0.92
CDC45	PRC1	0.92
NEK2	TUBG1	0.92
TIMELESS	RPA3	0.92
CDK1	ECT2	0.92
MAP2K3	GADD45B	0.92
LSM4	SF3B4	0.92
KIF20A	MAD2L1	0.92
CDCA8	TPX2	0.92
CDC45	RRM2	0.92
TOP2A	DLGAP5	0.92
NUSAP1	TPX2	0.92
NUSAP1	PRC1	0.92
RRM2	MCM6	0.92
PARP1	POLQ	0.92
CENPE	NCAPG	0.92
TOP2A	FEN1	0.92
TOP2A	RFC5	0.919
CDKN3	CCNB2	0.919
DSN1	CCNB2	0.919
PRC1	KIF2C	0.919
HJURP	STRA13	0.919
BARD1	POLE2	0.919
CDK5RAP2	AURKA	0.919
CENPL	CDCA8	0.919
CEBPA	ETS2	0.919
CENPF	RAD21	0.919
PSMB2	PSMD10	0.919
JUN	IL18R1	0.919
CEBPD	MYC	0.919
CBR3	CYP2E1	0.918
RGMB	CHRD	0.918
TOP2A	POLQ	0.918
CKAP5	CDC20	0.918
GINS2	POLE2	0.918
KIF20A	CCNA2	0.918
RRM2	ASF1B	0.918
JUN	H2AFZ	0.918
CDK5	CDK4	0.918
FEN1	RNASEH2A	0.918
RAD51AP1	RPA3	0.918
PCNA	APEX2	0.918
PRIM1	RRM1	0.918
JUNB	EGR1	0.917
PARP1	RPA3	0.917
CDK4	RPA3	0.917
CENPE	DLGAP5	0.917
NUSAP1	RRM2	0.917
CKAP5	CDCA8	0.917
CETN2	AURKA	0.917
NUSAP1	CDC20	0.917
MCM4	NCAPG	0.917
SFN	CDK6	0.916
CDK1	PSMB2	0.916
BARD1	RAD51AP1	0.916
CKAP5	CDK5RAP2	0.916
CKAP5	CETN2	0.916
KNTC1	SKA1	0.916
KIF2C	DLGAP5	0.916
PRC1	ASPM	0.916
ACTL6A	NME1	0.916
TOP2A	TPX2	0.916
RMI2	RPA3	0.916
KIF2C	CCNA2	0.916
CDK1	CENPL	0.916
PSMB2	MAD2L1	0.916
HMMR	TUBG1	0.916
CKS2	SKP2	0.915
NEK2	CDK5RAP2	0.915
PBK	MELK	0.915
CDK1	MCM2	0.915
H1F0	HMGB2	0.915
PSMD4	CDC25A	0.915
ASPM	MAD2L1	0.915
PBK	DLGAP5	0.915
TFDP1	TYMS	0.915
MAP2K3	TRAF2	0.915
NRG1	FYN	0.915
TYMS	NCAPG	0.915
PSMB2	CCNA2	0.915
CKAP5	RAD21	0.915
CCNA2	PSMD10	0.915
PTTG1	CDCA8	0.915
CCND1	PSMD10	0.915
PRIM1	DCTPP1	0.915
CDCA8	DLGAP5	0.915
SNRNP25	SNRPF	0.915
TOP2A	CENPA	0.915
CDCA5	NUP37	0.914
CENPL	CDC20	0.914
LSM4	ALYREF	0.914
PSMB2	CDC20	0.914
CKAP5	NEK2	0.914
CENPL	MAD2L1	0.914
CDC20	WSB1	0.914
INPPL1	ITPKA	0.914
TTK	DLGAP5	0.914
TOP2A	CDC45	0.914
CDK1	CDK5RAP2	0.914
ATP5G1	TOMM40	0.914
NCAPG	DLGAP5	0.914
RAB3IP	AZI1	0.913
PSMD2	TRAF2	0.913
FANCG	RPA3	0.913
NEDD4L	SKP2	0.913
CDKN3	NCAPG	0.913
SMG7	GSPT2	0.913
PSMB2	AURKA	0.913
LSM4	PUF60	0.913
NUP37	CENPM	0.913
CDK5	CDK6	0.912
KIF23	DLGAP5	0.912
AURKB	PSMB2	0.912
PCNA	NPLOC4	0.912
DCTPP1	POLA2	0.912
CCNE1	BARD1	0.912
SNRPB	TPR	0.912
ASPM	KIF23	0.912
RRM2	NCAPG	0.912
SERPINA1	CLEC3B	0.912
SNRPB	SNRNP25	0.912
PRIM1	NME1	0.912
CKAP5	NUP37	0.912
MELK	KIF23	0.912
AURKB	PSMD4	0.912
RFC5	RMI2	0.912
G6PD	TPI1	0.912
CCNF	HERC5	0.912
TOP2A	PTTG1	0.912
CENPL	KNTC1	0.911
PSMD4	SKP2	0.911
DSN1	NUP37	0.911
RRM2	DLGAP5	0.911
CENPL	CCNB2	0.911
CETN2	PARP1	0.911
CDKN3	MELK	0.911
PSMD4	CDC20	0.911
PRC1	TTK	0.911
CETN2	TPX2	0.911
TPX2	CCNB2	0.911
CDC45	TYMS	0.911
CDC25C	PKN3	0.91
RAD51C	SWI5	0.91
TFDP1	TK1	0.91
RAB3IP	PLK4	0.91
TOP2A	MELK	0.91
NEDD4L	CDC20	0.91
MELK	CCNB2	0.91
CDK1	TPR	0.91
JUNB	CCNA2	0.91
ONECUT1	CCND1	0.91
NUSAP1	AURKA	0.91
CDK5	CDK1	0.91
CENPL	CDCA5	0.91
AZI1	CETN2	0.91
TIMELESS	BARD1	0.91
KIF20A	NCAPG	0.91
RAD51C	RMI2	0.909
IL18R1	GADD45B	0.909
CDC20	PKMYT1	0.909
MAD2L1	PSMD10	0.909
PLCG2	ITPKA	0.909
ACTL6A	CCND1	0.909
EIF3B	RPL39L	0.909
BARD1	RPA3	0.909
NUSAP1	MELK	0.909
FOS	ZFP36	0.909
ADRA1B	AGTR1	0.909
DCTPP1	POLE2	0.909
PBK	CCNA2	0.909
KIF20A	CENPA	0.909
AKR1C3	CYP2E1	0.909
CLEC3B	SERPING1	0.909
POLE2	NME1	0.909
TOP2A	CENPF	0.909
NEDD4L	UBE2C	0.909
PUF60	CPSF4	0.909
AURKB	DLGAP5	0.909
TOP2A	KIF20A	0.909
PARP1	POLE2	0.908
NUSAP1	ASPM	0.908
PSMD2	AURKA	0.908
PUF60	EFTUD2	0.908
NEDD4L	CCNF	0.908
PSMD2	CDC20	0.908
PSMB2	UBE2C	0.908
CDC25A	PSMD10	0.908
PSMD4	AURKA	0.908
H2AFZ	CENPM	0.908
PSMD4	PTTG1	0.908
NEDD4L	HERC5	0.908
CDK5RAP2	TPX2	0.908
AZI1	CDK5RAP2	0.908
MELK	MAD2L1	0.908
HMMR	DLGAP5	0.908
CKAP5	CENPN	0.908
RACGAP1	MAD2L1	0.908
GTSE1	PSMB2	0.907
EXOSC7	ZFP36	0.907
SKA1	NUP37	0.907
SF3B4	SNRPF	0.907
AURKB	NUSAP1	0.907
A2M	CLEC3B	0.907
ALYREF	SNRPF	0.907
PTTG1	MAD2L1	0.907
LDLR	BIN1	0.907
ASPM	CENPE	0.907
CEBPD	SMARCA2	0.907
PTTG1	TPX2	0.907
RPS7	EXOSC7	0.907
CKAP5	CDCA5	0.907
RMI2	BARD1	0.907
TUBB4B	TPX2	0.907
PSMB2	FBXO5	0.906
NEK2	TUBB4B	0.906
STRA13	RPA3	0.906
MELK	CCNA2	0.906
CCNF	CKS1B	0.906
RACGAP1	DLGAP5	0.906
NEK2	TUBB	0.906
SPSB2	SOCS3	0.906
POLA2	NME1	0.906
CHEK1	CCNB2	0.906
CPSF4	SNRPF	0.906
GSPT2	RPL39L	0.906
HMMR	CETN2	0.906
RFC4	MAD2L2	0.906
CDK5	SFN	0.906
PSMB2	CCNE1	0.906
SKP2	PSMD10	0.906
UBE2C	HERC5	0.906
ASPM	NEK2	0.906
ALYREF	NUP37	0.906
KIF20A	CENPF	0.906
CCNA2	TRIP13	0.906
SOCS3	SKP2	0.906
CDKN3	PBK	0.905
TFDP1	MCL1	0.905
CDC20	PSMD10	0.905
CKS1B	CDK6	0.905
TIMELESS	MCM3	0.905
RAB3IP	CETN2	0.905
SUV39H1	PLOD3	0.905
TCTEX1D2	HSPB11	0.905
PBK	KIF23	0.905
CDCA8	RAD21	0.905
SOCS3	HERC5	0.905
CDC20	HERC5	0.905
SPSB2	HERC5	0.905
EFTUD2	CPSF4	0.905
NUSAP1	KIF20A	0.905
LSM4	CPSF4	0.905
CKAP5	DSN1	0.905
CDK5RAP2	TUBB	0.905
PSMB2	CDC25A	0.905
CHEK1	MAD2L1	0.905
TUBB	TPX2	0.905
CKAP5	CENPL	0.905
TPX2	MELK	0.905
CENPL	NUP37	0.905
SPSB2	WSB1	0.905
PSMD4	CCNE1	0.905
CDK5RAP2	TUBB4B	0.905
SKP2	WSB1	0.905
PTGS2	PLA2G16	0.905
MELK	DLGAP5	0.905
MAD2L1	RFC4	0.904
SOCS3	CDC20	0.904
CHEK1	CDKN3	0.904
UBE2C	TPX2	0.904
PTTG1	PSMD2	0.904
PTTG1	DLGAP5	0.904
CCNF	PLK4	0.904
CDC45	NCAPG	0.904
AZI1	CDK1	0.904
HERC5	RNF144B	0.904
PRC1	DLGAP5	0.904
STRA13	H2AFZ	0.904
CDK5RAP2	HAUS4	0.904
AURKB	TPR	0.904
RRM2	CDC20	0.904
CCNA2	DLGAP5	0.904
PHLDA1	AURKA	0.904
UBE2C	RNF144B	0.904
CDC20	RNF144B	0.904
SPSB2	SKP2	0.903
MAD2L2	RPA3	0.903
KIF20A	DLGAP5	0.903
RPL39L	EXOSC7	0.903
SOCS3	WSB1	0.903
NUSAP1	MAD2L1	0.903
EXO1	POLQ	0.903
AURKA	HAUS4	0.903
TPX2	KIF23	0.903
KNTC1	RAD21	0.903
SPSB2	CDC20	0.903
MAD2L1	TRIP13	0.903
CDK1	KIF4A	0.903
CKAP5	SKA1	0.903
CETN2	RPA3	0.903
MAD2L1	KIF23	0.903
CDK1	MELK	0.903
PLK4	HAUS4	0.903
TPX2	HAUS4	0.903
RAD21	SKA1	0.903
RFC5	NPLOC4	0.903
FEN1	CCNA2	0.903
CHEK1	CDC20	0.903
CPSF4	SF3B4	0.903
UBE2C	PSMD2	0.903
RAD21	NUP37	0.903
PTTG1	CCNA2	0.903
SPSB2	CCNF	0.903
CKAP5	HAUS4	0.903
HMMR	TUBB	0.903
CENPL	H2AFZ	0.903
BOP1	RPL39L	0.903
CDC45	RRM1	0.902
MAFF	HBB	0.902
FYN	ABLIM3	0.902
NEDD4L	RNF144B	0.902
CBX2	H2AFZ	0.902
STMN1	TUBA1C	0.902
CENPN	RAD21	0.902
CCNF	RNF144B	0.902
SKP2	HERC5	0.902
AZI1	NEK2	0.902
RFC5	MAD2L2	0.902
CKS2	CDK4	0.902
PSMD4	TRAF2	0.902
KIF20A	CDC20	0.902
CPSF4	NUP37	0.902
TIMELESS	PARP1	0.902
MAD2L1	MAD2L2	0.902
UBE2C	CDCA8	0.902
CENPF	DLGAP5	0.902
PTTG1	PSMD10	0.902
RAB3IP	CDK5RAP2	0.901
TPR	CCNB2	0.901
DSN1	RAD21	0.901
CCNE1	PSMD10	0.901
GBA	CCT7	0.901
TUBB	HAUS4	0.901
NEU1	GLA	0.901
GTSE1	PSMD2	0.901
PSMD4	FBXO5	0.901
AZI1	TUBB4B	0.901
PSMB2	SKP2	0.901
WSB1	RNF144B	0.901
TUBB4B	HAUS4	0.901
PUF60	ALYREF	0.901
SPSB2	RNF144B	0.901
CETN2	POLE2	0.901
SKP2	RNF144B	0.901
UBE2C	CBX2	0.901
NUSAP1	CCNA2	0.901
SNX5	AP1S1	0.901
KIF4A	MELK	0.901
SNRNP25	SF3B4	0.901
WDR34	HSPB11	0.901
CENPL	RAD21	0.901
HMMR	TUBB4B	0.901
NEK2	HAUS4	0.901
PLCG2	MTMR7	0.901
CCNF	SOCS3	0.901
HMMR	HAUS4	0.901
PUF60	SF3B4	0.901
AZI1	TUBG1	0.901
AZI1	TUBB	0.901
RAB3IP	NEK2	0.901
EFTUD2	SNRNP25	0.901
UBE2C	SOCS3	0.901
TOP2A	CDKN3	0.901
AZI1	HAUS4	0.901
CKAP5	CENPM	0.9
UBE2C	WSB1	0.9
MAD2L2	POLE2	0.9
TPD52L1	AP1S1	0.9
SMG7	RPS7	0.9
BIN1	AGTR1	0.9
CETN2	CBX2	0.9
AZI1	HMMR	0.9
CETN2	HAUS4	0.9
LDLR	PACSIN1	0.9
CKAP5	AZI1	0.9
CALD1	MYL6B	0.9
FBXO5	PSMD10	0.9
PSMB2	TRAF2	0.9
CBX2	BARD1	0.9
PSMD2	CCNE1	0.9
PSMB2	CCND1	0.9
NEK2	CENPF	0.9
GTSE1	PSMD4	0.9
NUSAP1	CDCA8	0.9
SETDB1	PLOD3	0.9
RAB3IP	TUBB4B	0.9
CCNF	WSB1	0.9
PSMD2	CDC25A	0.9
HERC5	WSB1	0.9
HMMR	CDK5RAP2	0.9
TPR	CDCA8	0.9
PSMD2	MAD2L1	0.9
TPD52L1	SH3D19	0.9
H2AFZ	BCL9	0.9
SPSB2	UBE2C	0.9
SORBS1	MYL6B	0.9
SOCS3	RNF144B	0.9
TNFRSF1B	PSMD10	0.9
NEDD4L	WSB1	0.9
AZI1	TPX2	0.9
SMG7	RPL39L	0.9
C9orf142	POLE2	0.9
NEDD4L	SOCS3	0.9
RRM2	MELK	0.9
AP1S1	SH3D19	0.9
SPSB2	NEDD4L	0.9
PTDSS1	PLA2G16	0.9
TPR	SNRPF	0.9
RAD21	CENPM	0.9
TPD52L1	SNX5	0.9
PLA2G16	CYP2E1	0.9
PRC1	CDCA8	0.9
CENPF	PTTG1	0.9
GTSE1	PSMD10	0.9
PNPLA7	PLA2G16	0.9
PSMD2	CCNA2	0.9
SORBS1	CALD1	0.9
TNFRSF1B	PSMD2	0.9
RAB3IP	HAUS4	0.9
RRM2	PBK	0.9
PSMD4	MAD2L1	0.9
TNFRSF1B	PSMB2	0.9
BST2	EGR1	0.9
RAB3IP	CDK1	0.9
PSMD2	SKP2	0.9
RAB3IP	TUBB	0.9
TNFRSF1B	PSMD4	0.9
AURKB	PSMD2	0.9
SNX5	SH3D19	0.9
RAB3IP	TUBG1	0.9
UBE2C	PSMD10	0.9
CDCA8	MELK	0.9
PSMD2	FBXO5	0.9
RAB3IP	CKAP5	0.9
TRAF2	PSMD10	0.9
NPLOC4	RPA3	0.9
C9orf142	CETN2	0.9
PSMD2	CCND1	0.9
AGTR1	PACSIN1	0.9
NUSAP1	CENPF	0.899
CDC20	DLGAP5	0.899
KIF4A	AURKA	0.899
CDC45	CCNA2	0.899
CDKN3	DLGAP5	0.899
NUSAP1	TOP2A	0.899
PTTG1	CDKN3	0.899
PBK	NCAPG	0.899
CDCA8	CCNA2	0.898
TOP2A	EXO1	0.898
NUSAP1	PBK	0.898
TOP2A	KIF2C	0.898
UBE2C	CENPA	0.898
KIF4A	CCNB2	0.898
CENPF	PBK	0.897
NCAPG	AURKA	0.897
PBK	AURKA	0.897
TTK	CDKN3	0.897
CENPF	TPX2	0.897
MCM7	CCNB2	0.897
CDC45	CDC20	0.897
RRM2	MCM2	0.897
CCNB2	PLK4	0.896
UBE2C	DLGAP5	0.896
CDC20	CDC25A	0.896
HJURP	CDK1	0.896
PBK	TPX2	0.896
PRC1	MELK	0.896
TIMELESS	MCM4	0.895
CENPF	CCNA2	0.895
AURKB	RRM2	0.895
CDK1	FEN1	0.895
CDK1	ASPM	0.894
PRC1	PTTG1	0.894
DNAJB11	SDF2L1	0.894
RRM2	TRIP13	0.894
NUSAP1	UBE2C	0.894
CDC45	CDK4	0.894
CENPF	NCAPG	0.894
TOP2A	MCM4	0.893
RRM2	TPX2	0.893
ASPM	CCNA2	0.893
TOP2A	PLK4	0.893
AURKB	CDC25C	0.893
RRM2	FEN1	0.892
TPX2	CCNA2	0.892
KIF2C	MELK	0.892
PRC1	RRM2	0.892
KIF20A	PTTG1	0.891
ASPM	EXO1	0.891
CDC20	MELK	0.891
KIF4A	CDC20	0.891
TPX2	CENPE	0.891
CENPF	AURKA	0.891
CENPA	MELK	0.891
KIF20A	PBK	0.891
TTK	CENPF	0.891
PCNA	MUTYH	0.89
KIF23	MCM3	0.89
CCNA2	NCAPG	0.89
RRM2	CDKN3	0.89
SUV39H1	CBX3	0.89
TYMS	AURKA	0.89
CHEK1	NCAPG	0.89
CCNB2	TRIP13	0.889
TTK	PBK	0.889
RRM2	AURKA	0.889
CENPA	TPX2	0.889
RFC5	MCM4	0.889
TTK	PLK4	0.889
KIF2C	NCAPG	0.889
CCNA2	FBXO5	0.889
MELK	NCAPG	0.888
PRC1	UBE2C	0.888
CDC20	PLK4	0.888
MT1G	MT1X	0.888
KIF20A	MELK	0.888
ASPM	CDC20	0.888
MT1X	MT1E	0.888
EPHA2	INPPL1	0.887
DKC1	EIF3B	0.887
HIST1H4H	ASF1B	0.887
CKS2	CDK6	0.887
CDC20	PBK	0.887
ASPM	DLGAP5	0.887
ASPM	PBK	0.887
HMMR	PBK	0.887
CDC20	TRIP13	0.886
CENPA	SMARCA2	0.886
ASPM	TPX2	0.886
ASPM	CDKN3	0.886
NUSAP1	TTK	0.886
ASPM	AURKA	0.886
CDC45	UBE2C	0.886
CDC20	NCAPG	0.886
MCM7	RNASEH2A	0.886
CDC45	EXO1	0.886
ASPM	RRM2	0.885
AURKB	MCM5	0.885
PRC1	TPX2	0.885
RAD21	CHTF18	0.885
RRM1	RFC4	0.885
CENPF	MELK	0.884
CDC20	KIF23	0.884
KIF20A	TTK	0.884
CCNF	CKS2	0.884
KIF20A	MCM3	0.884
HMMR	CENPF	0.884
RACGAP1	PBK	0.884
PCNA	CKS2	0.884
CHEK1	PBK	0.884
TOP2A	CDCA8	0.883
CHEK1	RRM1	0.883
GINS2	NCAPG	0.883
CDK1	KPNA2	0.882
KIF2C	UBE2C	0.882
KIF20A	ASPM	0.882
PTTG1	PBK	0.882
RFC5	MCM3	0.882
PTTG1	NCAPG	0.882
CDT1	GINS2	0.882
HMMR	NCAPG	0.881
HJURP	MELK	0.881
TTK	MCM4	0.881
NUSAP1	PTTG1	0.881
CDK5	CDC25A	0.881
NUSAP1	KIF23	0.88
ASPM	MELK	0.88
KIF4A	DLGAP5	0.88
KIF4A	CENPA	0.879
CDK1	MCM6	0.879
UBE2C	NCAPG	0.879
CDC45	MELK	0.879
RNASEH2A	MCM5	0.879
KIF2C	ASPM	0.879
CDKN3	TPX2	0.878
CDK5	CKS1B	0.878
TOP2A	DKC1	0.878
TOP2A	KIF4A	0.878
FYN	ACACA	0.878
NEK2	DLGAP5	0.878
KIF4A	CCNA2	0.877
KIF2C	TTK	0.877
TOP2A	HMMR	0.877
CDC45	CDCA8	0.877
NUSAP1	CENPA	0.876
CENPF	UBE2C	0.876
CDK5	H1F0	0.876
CDCA8	PBK	0.876
TOP2A	CKS2	0.876
RACGAP1	AURKA	0.876
MELK	AURKA	0.875
EPHA2	ACACA	0.875
TPX2	NCAPG	0.875
CDC45	RFC4	0.875
CKS2	PTTG1	0.875
UBE2C	CDKN3	0.875
HMMR	MAD2L1	0.875
TTK	CENPA	0.875
PTTG1	CENPA	0.875
PIM3	ACACA	0.875
ACACA	PBK	0.875
CHEK1	FEN1	0.875
MELK	TRIP13	0.875
CDK5	CKS2	0.875
TTK	NEK2	0.875
ACACA	MELK	0.875
HMMR	PTTG1	0.875
ASPM	CENPF	0.874
CHTF18	POLE2	0.874
TOP2A	MCM3	0.874
MAD2L1	FBXO5	0.874
TTK	MELK	0.874
PTTG1	MELK	0.874
RACGAP1	CCNA2	0.874
KIF23	NCAPG	0.874
CDC45	FEN1	0.874
TOP2A	CENPE	0.873
TTK	CKS1B	0.873
PCNA	LOC81691	0.873
PRC1	PBK	0.873
CDC20	MCM2	0.873
SMARCA2	ASF1B	0.873
RRM2	EXO1	0.872
RACGAP1	MELK	0.872
CDK1	TRIP13	0.872
E2F2	ACACA	0.872
CDK1	RRM1	0.871
ASPM	UBE2C	0.871
CDC45	KIF2C	0.871
KIF20A	UBE2C	0.871
RRM2	PTTG1	0.871
EXO1	NCAPG	0.871
CALM3	ITPKA	0.871
NUSAP1	TYMS	0.87
CDC45	TTK	0.87
CHEK1	MELK	0.87
KIF2C	PTTG1	0.87
MCM2	CDK4	0.869
ASPM	CCNB2	0.869
CENPF	KIF23	0.869
HMMR	MELK	0.869
TYMS	CCNB2	0.869
TTK	KIF23	0.869
RRM2	UBE2C	0.869
AURKB	MELK	0.869
KIF20A	CDKN3	0.868
HMMR	ASPM	0.868
HJURP	CDCA8	0.868
PRC1	CENPA	0.868
HMMR	CENPE	0.868
KIF4A	CDCA8	0.868
NUSAP1	CKS2	0.868
CENPA	CDKN3	0.868
CCNF	CDK4	0.868
CALD1	CALM3	0.868
HMMR	TTK	0.868
CENPF	CDKN3	0.867
CENPA	PBK	0.867
PCNA	CDKN3	0.867
KIF2C	NEK2	0.867
MAD2L1	RAD51AP1	0.867
PRC1	CKS2	0.867
NEK2	CCNB2	0.867
NUSAP1	HMMR	0.867
HMMR	CCNA2	0.866
HMMR	CCNB2	0.866
HJURP	KIF20A	0.866
CDC45	CDC25A	0.866
KIF20A	HMMR	0.866
CCNB2	MCM4	0.866
PRIM1	RNASEH2A	0.866
KIF20A	RRM2	0.866
ASPM	PTTG1	0.866
CENPA	DLGAP5	0.865
TTK	TPX2	0.865
HMMR	UBE2C	0.865
CHEK1	TYMS	0.865
NUSAP1	HJURP	0.865
CDT1	RRM1	0.865
UBE2C	MELK	0.865
CKS2	CDC20	0.864
KIF20A	NEK2	0.864
UBE2C	PBK	0.864
PBK	CENPE	0.863
HMMR	CENPA	0.863
CDK1	RAD51AP1	0.863
CDCA8	NCAPG	0.863
HJURP	DLGAP5	0.863
MT1X	MT2A	0.862
CKS2	KPNA2	0.862
NUSAP1	RACGAP1	0.862
CDC45	PBK	0.862
TTK	PTTG1	0.861
NEK2	CCNA2	0.861
CDC20	MCM4	0.861
TOP2A	MCM6	0.861
CDK5	CCNA2	0.861
KIF2C	TROAP	0.861
MAD2L1	ECT2	0.861
PLK4	NCAPG	0.86
ASPM	CDCA8	0.86
PTTG1	TYMS	0.86
TYMS	CCNA2	0.86
EXO1	MELK	0.859
KIF4A	ASPM	0.859
CKS2	AURKA	0.859
NUSAP1	CDKN3	0.859
CCNA2	GINS2	0.859
H1F0	CDK4	0.858
RFC5	MCM5	0.858
NCAPG	TRIP13	0.858
HMMR	CDKN3	0.858
TOP2A	RAD51AP1	0.857
MCM2	AURKA	0.857
NEK2	CDCA8	0.857
MELK	ECT2	0.857
RRM2	CDCA8	0.857
PRC1	TYMS	0.857
NEK2	CENPE	0.857
KIF4A	MAD2L1	0.856
AURKB	HJURP	0.856
RRM2	CENPA	0.856
HJURP	NCAPG	0.856
CCNA2	RAD51AP1	0.856
HMGB2	H2AFZ	0.855
CHEK1	DLGAP5	0.855
KIF4A	PBK	0.855
CDK1	MCM7	0.855
TTK	UBE2C	0.855
CDT1	CCNB2	0.854
KIF20A	PLK4	0.854
CDC45	DLGAP5	0.854
PBK	RAD51AP1	0.854
HJURP	TPX2	0.854
EXO1	FEN1	0.854
PBK	TRIP13	0.853
KIF4A	NCAPG	0.853
H1F0	CDK6	0.853
RFC4	AURKA	0.853
TPX2	TRIP13	0.853
KIF2C	PBK	0.853
MAD2L1	MCM4	0.853
CKS2	UBE2C	0.852
ASF1B	MCM5	0.852
ASF1B	MCM3	0.852
CKS2	NCAPG	0.852
ATAD2	CCNA2	0.852
CDKN3	PKMYT1	0.852
ASPM	CENPA	0.852
CDC45	ASPM	0.852
KIF4A	NEK2	0.851
CDC45	ASF1B	0.851
CHEK1	RRM2	0.851
CDKN3	FEN1	0.851
PCNA	CDC25C	0.851
NCAPG	POLE2	0.851
NUSAP1	KIF4A	0.851
KIF2C	CDKN3	0.851
KNTC1	NCAPG	0.85
AURKB	HMMR	0.85
AURKB	FEN1	0.85
SAC3D1	CETN2	0.85
MELK	RAD51AP1	0.85
TOP2A	KIF23	0.849
HJURP	CCNB2	0.849
RACGAP1	NCAPG	0.849
CDCA8	GINS2	0.849
CCNB2	GINS2	0.849
PRC1	PLK4	0.849
GINS2	CENPM	0.849
PRC1	HMMR	0.848
EXO1	CCNA2	0.848
CCNF	CDK6	0.848
TTK	RAD51AP1	0.848
CCNF	MCM5	0.848
KIF20A	TRIP13	0.848
MCM4	AURKA	0.848
NUSAP1	GINS2	0.848
NEK2	CENPA	0.848
PRC1	MCM2	0.847
UBE2T	PTTG1	0.847
AURKB	PLK4	0.847
DNAJC9	RFC4	0.847
NUSAP1	NEK2	0.847
CDC25C	PLK4	0.847
MAD2L1	MCM6	0.847
HMMR	KIF2C	0.846
EXO1	PBK	0.846
MAD2L1	GINS2	0.845
HJURP	CCNA2	0.845
CENPA	KIF23	0.845
RRM2	PRIM1	0.845
POLA2	GINS2	0.845
MCM3	RNASEH2A	0.845
FEN1	NCAPG	0.845
EXO1	DLGAP5	0.844
PRC1	NEK2	0.844
KPNA2	CCNB2	0.844
RACGAP1	TPX2	0.844
RFC4	NCAPG	0.843
NCAPG	RAD51AP1	0.843
HMMR	CDC20	0.843
PRIM1	MAD2L1	0.843
TYMS	MELK	0.843
MELK	CENPE	0.843
AURKA	TRIP13	0.842
CHEK1	CENPA	0.842
CDK1	TK1	0.842
CCNF	PKMYT1	0.842
NUSAP1	CENPE	0.842
TPX2	MAD2L1	0.841
CDC45	PTTG1	0.841
MT1X	MT1F	0.841
RRM2	GINS2	0.841
RFC4	CCNA2	0.841
AURKB	MCM2	0.841
NEK2	PBK	0.841
CDC45	TPX2	0.841
CDKN3	CDK4	0.841
TYMS	MAD2L1	0.84
FOS	CALM3	0.84
TYMS	CDC20	0.84
KIF4A	CDKN3	0.84
HMMR	KIF4A	0.839
PLK4	KIF23	0.839
CDC45	CENPA	0.839
HJURP	PTTG1	0.839
PRIM1	TYMS	0.839
MELK	RFC4	0.838
FEN1	AURKA	0.838
PRC1	CENPF	0.838
CDKN3	CKS1B	0.838
TOP2A	MCM7	0.837
TOP2A	TRIP13	0.837
HIST1H4C	ASF1B	0.837
HJURP	KIF2C	0.837
CDC20	MCM5	0.837
RRM2	ATAD2	0.837
NUSAP1	CDC45	0.837
AURKB	CDT1	0.836
ASPM	ECT2	0.836
NEK2	NECAB3	0.836
FEN1	RRM1	0.836
TYMS	FEN1	0.836
NUSAP1	RAD51AP1	0.835
DLGAP5	RAD51AP1	0.835
HMMR	RRM2	0.835
RRM2	KIF23	0.835
CCNB2	MCM6	0.835
HJURP	AURKA	0.835
CDC20	GINS2	0.835
HJURP	UBE2C	0.835
CDK1	GINS2	0.835
CDKN3	TYMS	0.835
CKS2	CKS1B	0.835
MT1E	MT2A	0.835
KIF2C	CDT1	0.835
TTK	TRIP13	0.835
UBE2C	RACGAP1	0.835
NCAPG	FBXO5	0.834
RFC4	RNASEH2A	0.834
EXO1	TPX2	0.834
NUSAP1	CENPM	0.834
HSPH1	DNAJB11	0.834
KIF20A	CDC25C	0.833
ASPM	TYMS	0.833
CHEK1	HMMR	0.833
ASPM	RACGAP1	0.833
GINS2	AURKA	0.832
TTK	ECT2	0.832
HJURP	KIF4A	0.832
UBE2C	GINS2	0.832
PTTG1	CENPE	0.832
RRM2	RACGAP1	0.831
ASPM	RAD51AP1	0.831
TYMS	GINS2	0.831
HJURP	ASPM	0.831
KIF4A	TTK	0.83
NEDD4L	SFN	0.83
CKAP5	TUBA1C	0.83
TYMS	PBK	0.83
NEK2	MELK	0.83
KIF20A	CENPM	0.83
CHEK1	AURKA	0.83
ASPM	KNTC1	0.829
AURKB	TROAP	0.829
CDT1	NCAPG	0.829
HJURP	TTK	0.829
MELK	GINS2	0.829
CCNB2	GADD45B	0.829
TTK	RRM2	0.829
CDKN3	RFC4	0.829
AURKB	PBK	0.829
CCNF	MCM7	0.828
HJURP	HMMR	0.828
NUSAP1	PLK4	0.828
PBK	ECT2	0.828
TTK	RACGAP1	0.827
CHEK1	GINS2	0.827
GINS2	TRIP13	0.826
CDC45	MAD2L1	0.826
CENPA	MCM2	0.826
CDC45	CENPM	0.826
CDKN3	CENPE	0.826
MT1G	MT1E	0.826
CENPN	MELK	0.826
CDC45	CHAF1B	0.826
TTK	EXO1	0.826
TTK	MCM3	0.826
NCAPD2	AURKA	0.825
CENPF	EXO1	0.825
TOP2A	CDT1	0.825
NEK2	NCAPG	0.825
PTTG1	RACGAP1	0.825
MT1G	MT2A	0.825
TOP2A	RNASEH2A	0.825
AURKB	TRIP13	0.824
CDK5	CCNF	0.824
GINS2	DLGAP5	0.824
AURKB	NEK2	0.824
AURKA	MCM5	0.824
TOP2A	SMARCA2	0.823
AURKB	ASF1B	0.823
LBR	SQLE	0.823
CDKN3	CDCA8	0.823
CKS1B	AURKA	0.823
CDC45	CENPF	0.822
CKAP5	TUBA1B	0.822
TYMS	CDCA7	0.822
AURKB	ASPM	0.822
KIF4A	UBE2C	0.822
CENPN	NCAPG	0.821
UBE2C	KIF23	0.821
NEK2	RAD51AP1	0.821
HMMR	CDCA8	0.821
DSN1	CBX3	0.821
HJURP	TOP2A	0.821
NUSAP1	TRIP13	0.821
KIF2C	TRIP13	0.82
TPX2	TROAP	0.82
CKS1B	RFC4	0.82
CDCA8	RAD51AP1	0.82
TIMELESS	CHTF18	0.82
TYMS	RFC4	0.82
CHEK1	ASPM	0.82
NEK2	KIF23	0.82
TOP2A	TK1	0.819
CDK5	CCND1	0.819
TYMS	MCM3	0.819
CALM3	MYO5C	0.819
CDCA8	TRIP13	0.819
NUSAP1	CHEK1	0.819
CENPA	RACGAP1	0.819
CENPN	CCNA2	0.819
JUNB	ZFP36	0.819
HMMR	KIF23	0.819
AURKB	CHEK1	0.819
ASPM	POLQ	0.818
DLGAP5	FBXO5	0.818
ATP2A2	ATP1A1	0.818
HMMR	RAD51AP1	0.818
CDC25C	CDK4	0.818
MELK	CENPM	0.818
AKR1C2	AKR1C3	0.817
UBE2C	CKS1B	0.817
CDC45	KIF23	0.817
PCNA	KPNA2	0.817
KPNA2	MAD2L1	0.817
HJURP	PBK	0.817
CDK1	POLE2	0.817
UBE2C	CENPE	0.817
CDC20	TROAP	0.816
TTK	NCAPD2	0.816
CCL4L1	JUN	0.816
TYMS	DLGAP5	0.816
CDK5	CDC25C	0.816
FEN1	MELK	0.816
TIMELESS	TOP2A	0.815
CDC45	CDKN3	0.815
CHEK1	NEK2	0.815
CDKN3	MCM4	0.815
MELK	MCM2	0.815
CDKN3	CDC25C	0.815
DLGAP5	ECT2	0.815
CCNA2	CENPM	0.815
CHEK1	TTK	0.815
AURKB	TYMS	0.815
CDC45	TRIP13	0.814
RFC4	CCNB2	0.814
CENPN	PBK	0.814
PRIM1	NCAPG	0.814
MELK	MCM4	0.814
CCNB2	MCM3	0.813
CDC20	CCT7	0.813
NEK2	CDKN3	0.813
HSPH1	CCT7	0.813
RFC4	GINS2	0.813
KIF2C	CDC25C	0.813
HJURP	CDC20	0.813
CDC20	MCM7	0.813
CDC20	MAD2L2	0.813
CHEK1	TPX2	0.813
HJURP	CDC45	0.812
CKS2	ASPM	0.812
MYC	PARP1	0.812
KPNA2	AURKA	0.812
RRM2	RAD51AP1	0.812
CDK6	MCM2	0.812
KIF4A	CENPF	0.811
CKS2	MELK	0.811
NCAPG	CENPM	0.811
POLA2	CHTF18	0.811
MCM4	TRIP13	0.811
CDK1	PRIM1	0.811
H2AFZ	SMARCA2	0.811
CDKN3	RACGAP1	0.811
HJURP	RRM2	0.81
TTK	PRIM1	0.81
CENPA	TRIP13	0.81
DLGAP5	TRIP13	0.81
CCNA2	POLE2	0.81
PRC1	FEN1	0.81
FYN	SKAP1	0.81
FEN1	MAD2L1	0.809
MCM2	NCAPG	0.809
TOP2A	ATAD2	0.809
NEK2	RACGAP1	0.809
HJURP	CENPF	0.808
CCL4L1	FOS	0.808
TTK	POLE2	0.808
TOP2A	ECT2	0.808
HJURP	CENPE	0.808
NUSAP1	CENPN	0.808
PRC1	GINS2	0.808
TOP2A	POLE2	0.808
NCAPG	MCM3	0.808
TOP2A	CKS1B	0.807
RRM1	CCNB2	0.807
UBE2C	TROAP	0.807
TYMS	TPX2	0.807
ACACA	CBR3	0.807
CDCA8	TROAP	0.807
TOP2A	CENPM	0.807
KIF20A	MCM4	0.807
CDKN3	GINS2	0.807
CHEK1	KIF2C	0.807
CKS2	RRM2	0.807
PRC1	TRIP13	0.806
MCM2	POLQ	0.806
CDKN3	KIF23	0.806
CDCA8	MCM2	0.806
FEN1	GINS2	0.806
CDC45	CDCA5	0.806
TTK	FEN1	0.806
ECT2	RAD51AP1	0.806
LSM4	RMI2	0.806
ASPM	PLK4	0.806
AURKB	GINS2	0.806
RRM2	CENPM	0.805
RFC4	CSE1L	0.805
KIF20A	RAD51AP1	0.805
TPX2	RAD51AP1	0.805
CDC45	KIF20A	0.805
GTSE1	CDC20	0.805
MCM2	TRIP13	0.805
CENPN	AURKA	0.805
HJURP	CDKN3	0.804
CCNA2	ECT2	0.804
POLQ	AURKA	0.804
TTK	TYMS	0.804
PLK4	CENPE	0.804
RRM1	DNAJB11	0.804
CHEK1	CDCA8	0.804
CENPF	RRM2	0.804
CDKN2A	CDKN3	0.804
CKS2	TYMS	0.803
UBE2T	CENPF	0.803
FYN	TRAF2	0.803
STMN1	STIP1	0.803
CDK5	PCNA	0.803
RACGAP1	MCM3	0.803
AURKB	GTSE1	0.803
MYC	MCL1	0.802
GTSE1	KIF2C	0.802
PRC1	MCM5	0.802
GINS2	RNASEH2A	0.802
HMMR	RACGAP1	0.802
NSDHL	LBR	0.802
FEN1	TRIP13	0.802
CDC45	HMMR	0.802
CENPN	GINS2	0.802
PCNA	CKS1B	0.802
MAD2L1	TUBG1	0.802
CDC20	CDK4	0.802
UBE2C	TRIP13	0.802
MAD2L1	ATAD2	0.801
MCM2	CHTF18	0.801
HIST1H4C	HIST1H4H	0.801
MT1X	MT1A	0.801
RFC5	MAD2L1	0.801
CKS2	CDKN3	0.801
PTGS2	HMOX1	0.801
TOMM40L	TOMM40	0.801
SCGN	MYO5C	0.801
PCNA	RNASEH2A	0.8
KIF2C	RRM2	0.8
PSMB2	ACACA	0.8
CENPA	MCM4	0.8
RAI14	MYO5C	0.8
FEN1	CCNB2	0.8
PCNA	CENPA	0.799
DNAJC9	MCM6	0.799
PRC1	RFC4	0.799
KIF2C	GINS2	0.799
HJURP	PRC1	0.799
PRC1	RAD51AP1	0.799
NUSAP1	ECT2	0.799
TPX2	ATAD2	0.799
NEK2	PTTG1	0.799
[truncated: 3,291 more rows]
